# Supplementary material for: Influence of omega-3 fatty acids on skeletal muscle protein metabolism and mitochondrial bioenergetics in older adults
Source: PubMed Central journal article supplement (PMC5425117; doi:10.18632/aging.101210), 2017-04-05
Supplement: aging-09-1096-s001.pdf [file aging-09-1096-s001.pdf]

SUPPLEMENTARY MATERIALS

Supplemental Figures

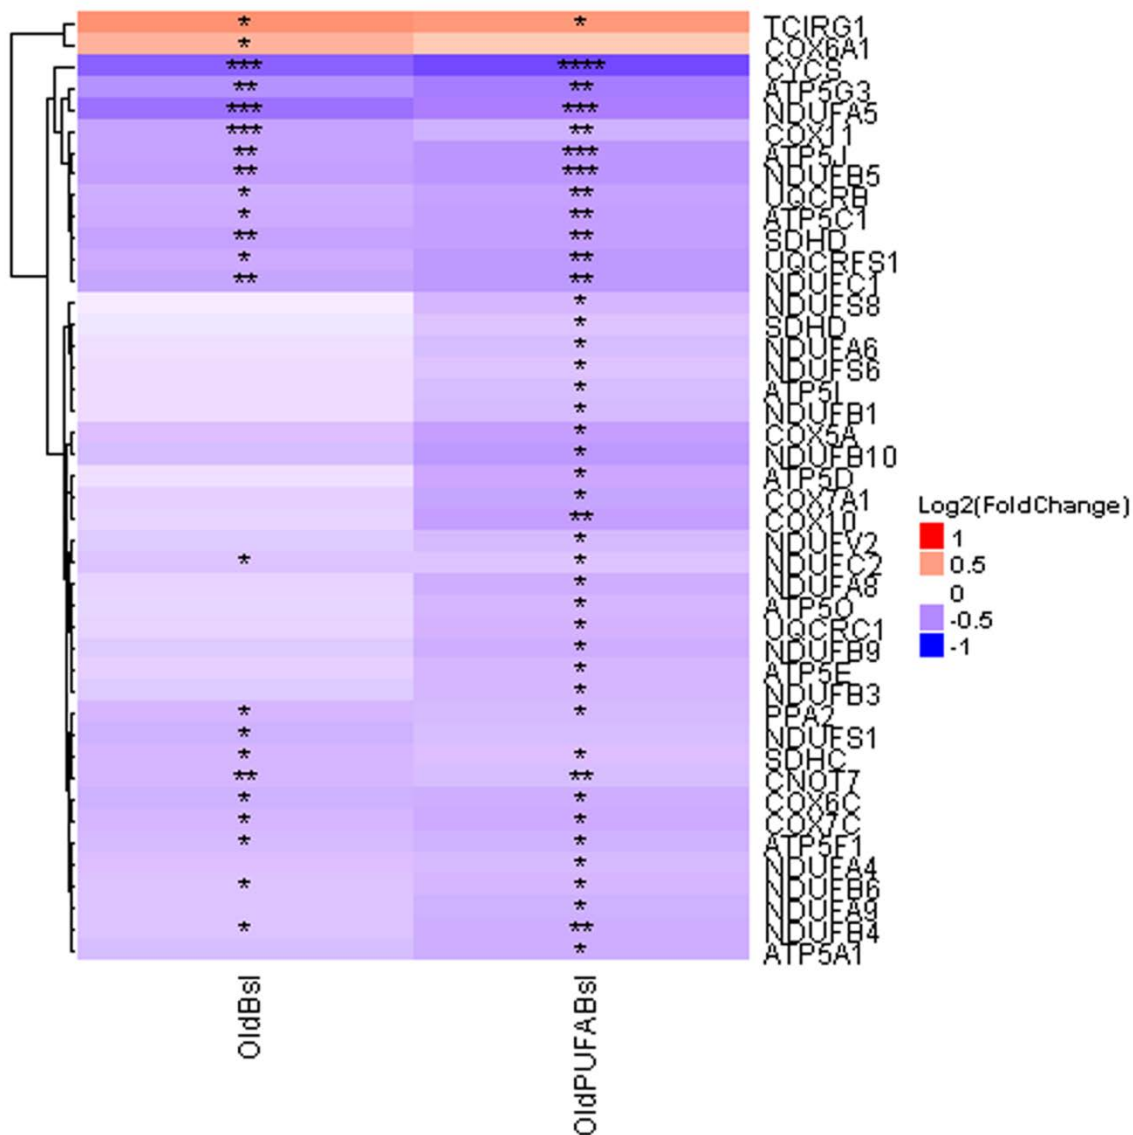

**Supplemental Figure 1.** The heatmap shows fold changes for genes related to oxidative phosphorylation in old baseline preintervention and old baseline postintervention relative to young baseline. A positive fold change (red) indicates upregulated in old compared to young, and a negative fold change (blue) indicated downregulated in old compared to young. \* denotes where the fold change was statistically significant (p<0.05).

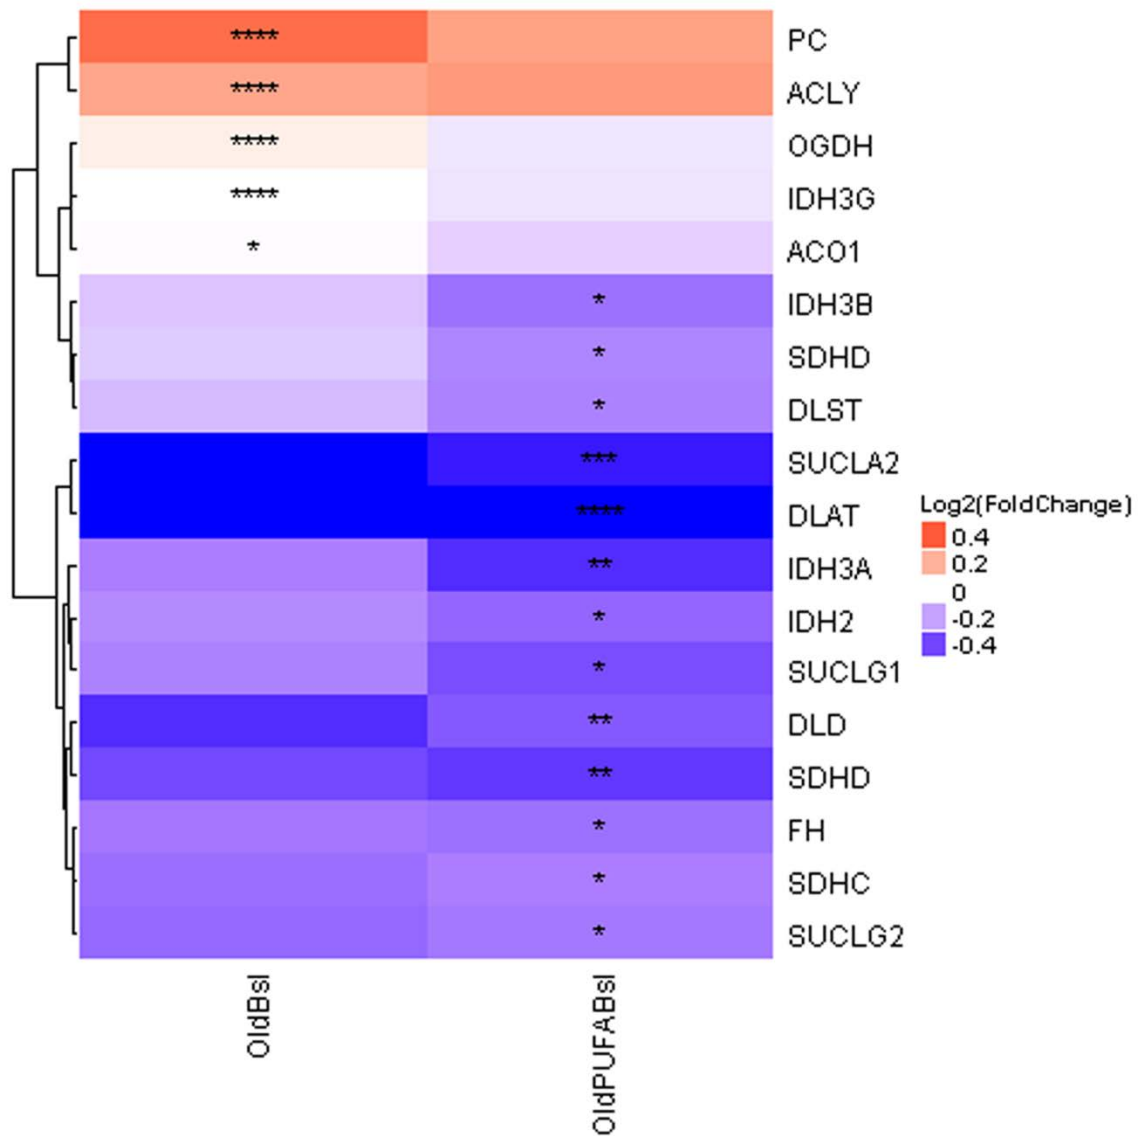

**Supplemental Figure 2.** The heatmap shows fold changes for genes related to tricarboxylic acid cycle in old baseline preintervention and old baseline postintervention relative to young baseline. A positive fold change (red) indicates upregulated in old compared to young, and a negative fold change (blue) indicated downregulated in old compared to young. \* denotes where the fold change was statistically significant ( $p \leq 0.05$ ).

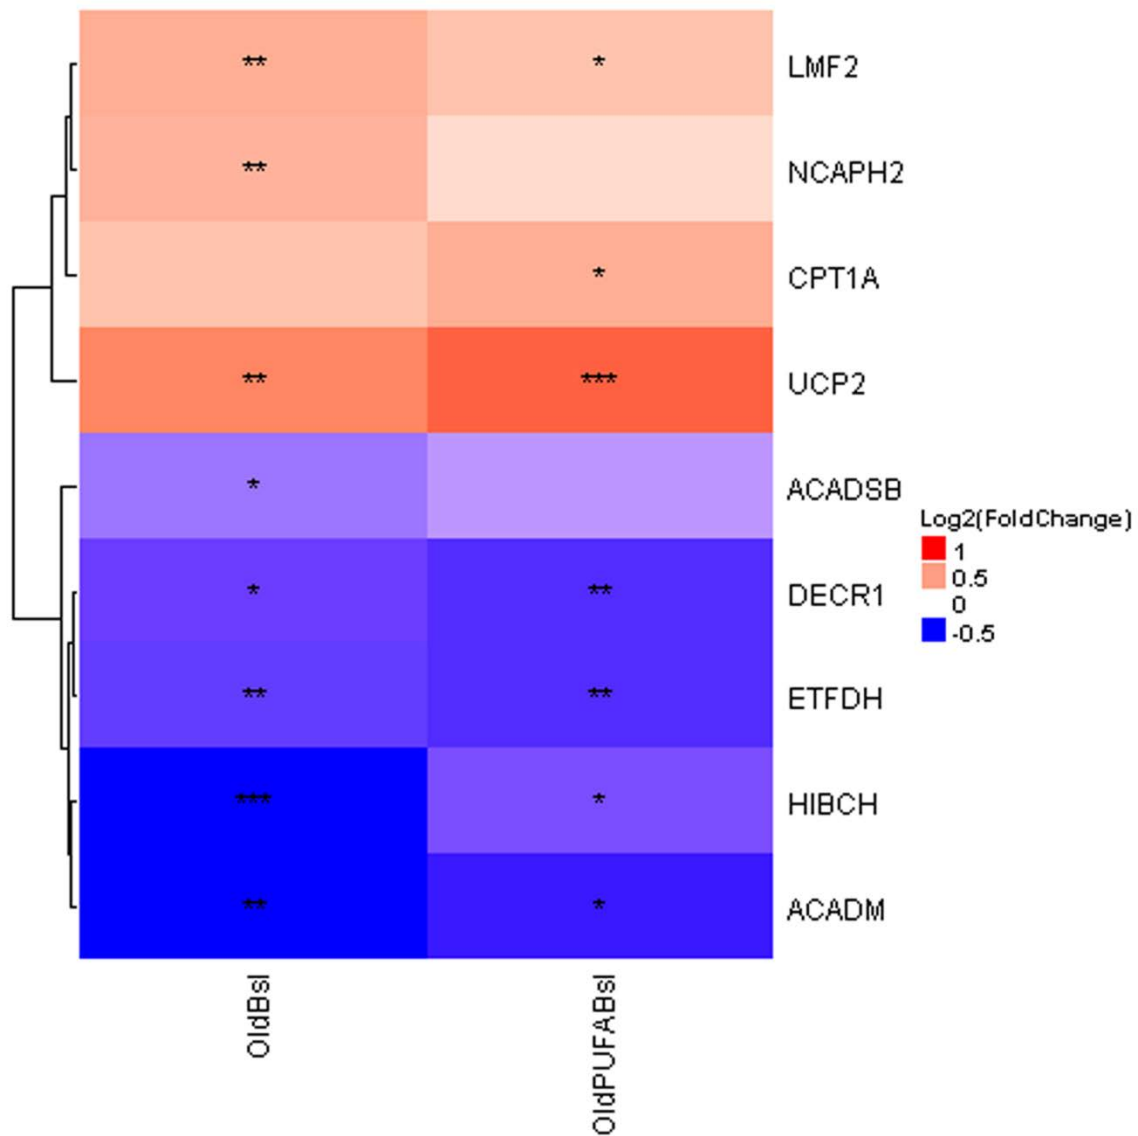

**Supplemental Figure 3.** The heatmap shows fold changes for genes related to lipid metabolism in old baseline preintervention and old baseline postintervention relative to young baseline. A positive fold change (red) indicates upregulated in old compared to young, and a negative fold change (blue) indicated downregulated in old compared to young. \* denotes where the fold change was statistically significant ( $p \leq 0.05$ ).

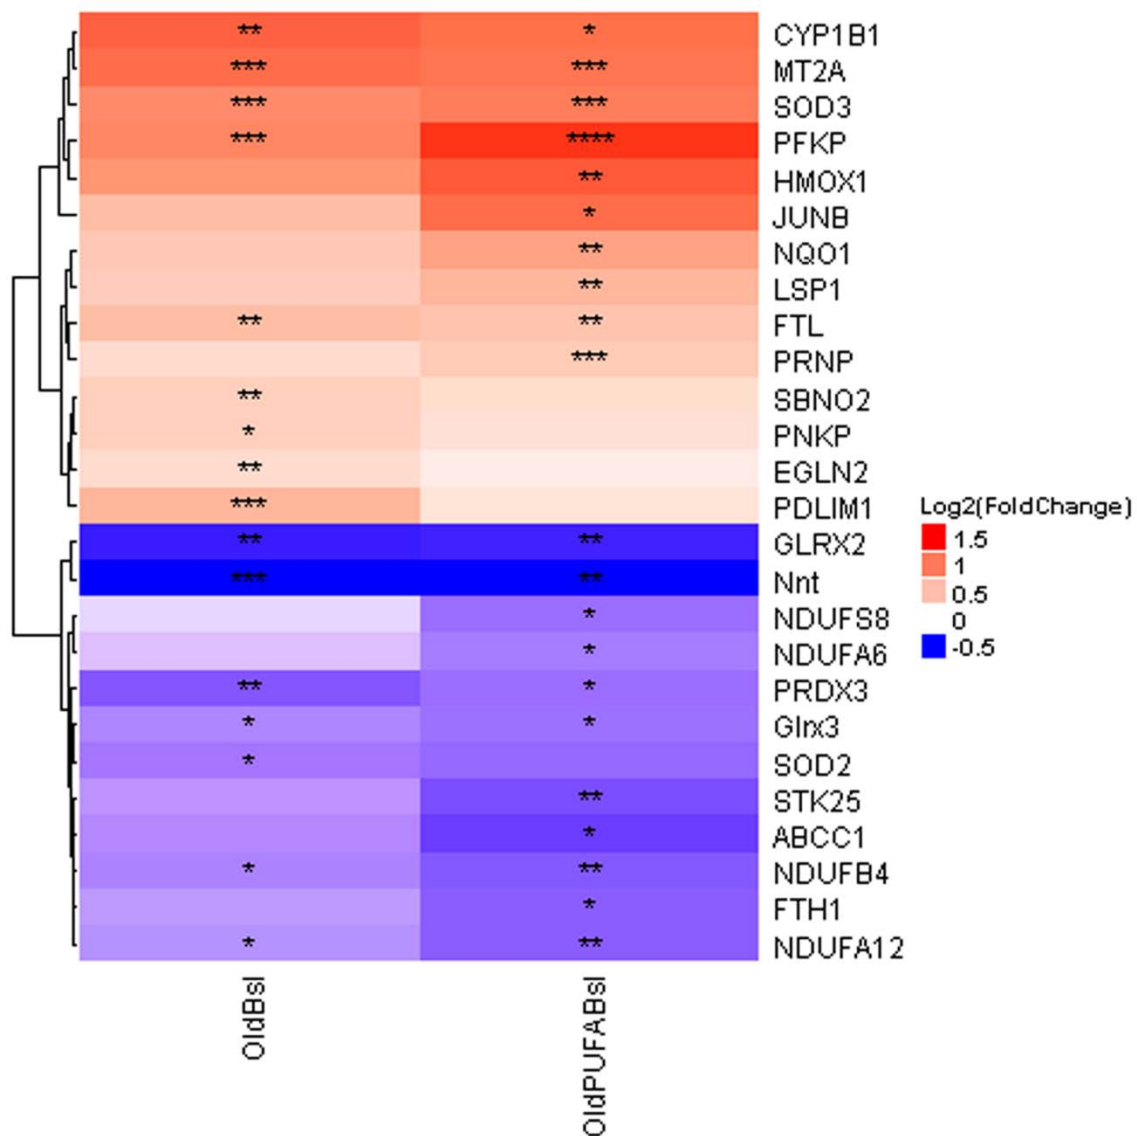

**Supplemental Figure 4.** The heatmap shows fold changes for genes related to oxidative stress in old baseline preintervention and old baseline postintervention relative to young baseline. A positive fold change (red) indicates upregulated in old compared to young, and a negative fold change (blue) indicated downregulated in old compared to young. \* denotes where the fold change was statistically significant ( $p \leq 0.05$ ).

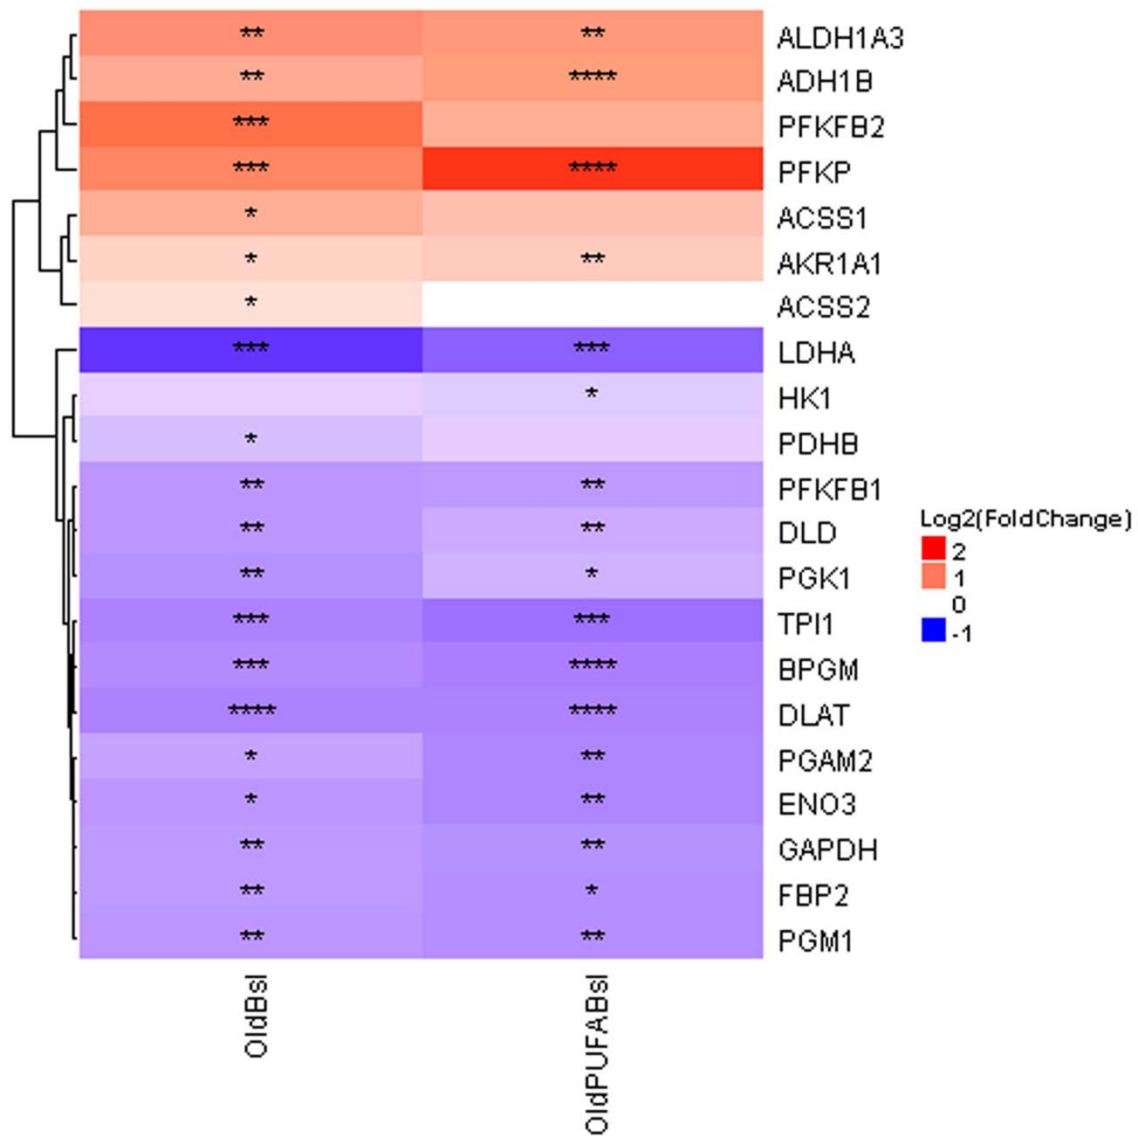

**Supplemental Figure 5.** The heatmap shows fold changes for genes related to glycolysis in old baseline preintervention and old baseline postintervention relative to young baseline. A positive fold change (red) indicates upregulated in old compared to young, and a negative fold change (blue) indicated downregulated in old compared to young. \* denotes where the fold change was statistically significant ( $p \leq 0.05$ ).

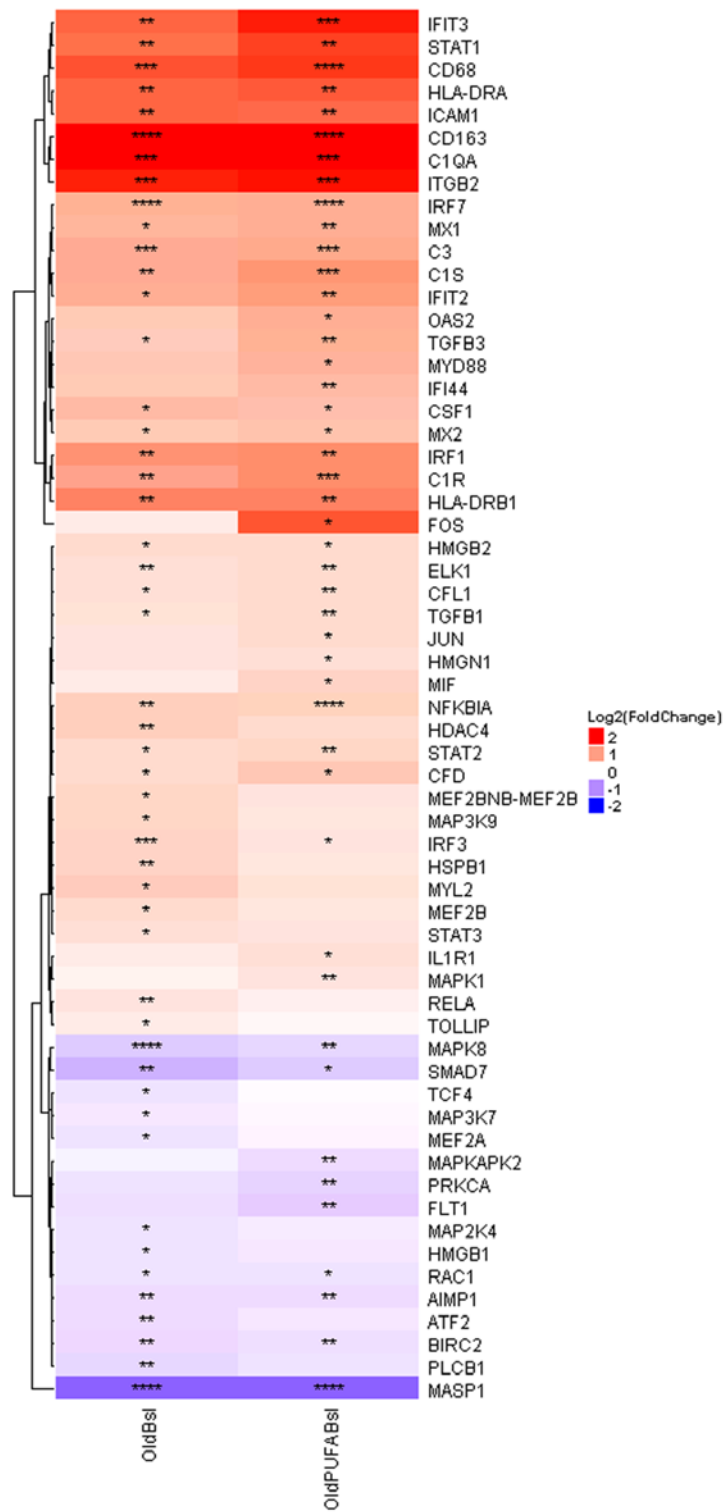

**Supplemental Figure 6.** The heatmap shows fold changes for genes related to inflammation in old baseline preintervention and old baseline postintervention relative to young baseline. A positive fold change (red) indicates upregulated in old compared to young, and a negative fold change (blue) indicated downregulated in old compared to young. \* denotes where the fold change was statistically significant ( $p < 0.05$ ).

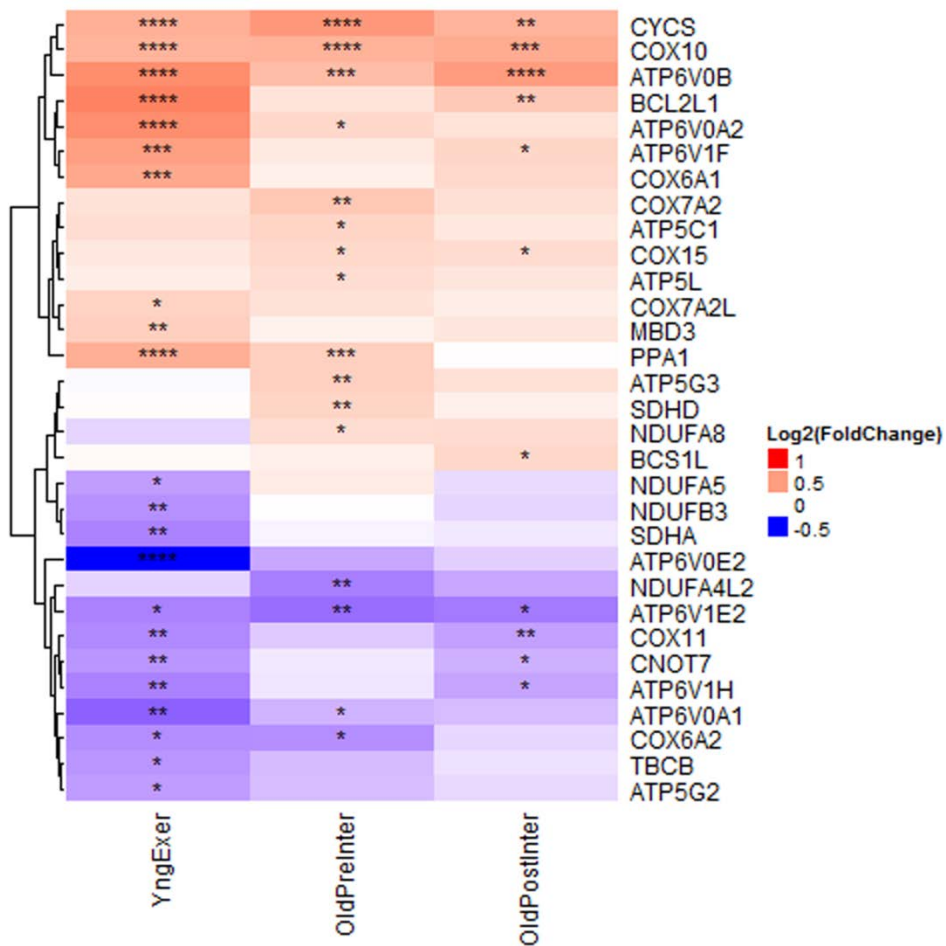

**Supplemental Figure 7.** The heatmap shows post exercise fold changes for genes related to oxidative phosphorylation in young, old, and old post-supplementation relative to their respective baseline transcript levels. A positive fold change (red) indicates upregulated after exercise, and a negative fold change (blue) indicated downregulated after exercise. \* denotes where the fold change was statistically significant from pre-exercise ( $p \leq 0.05$ ).

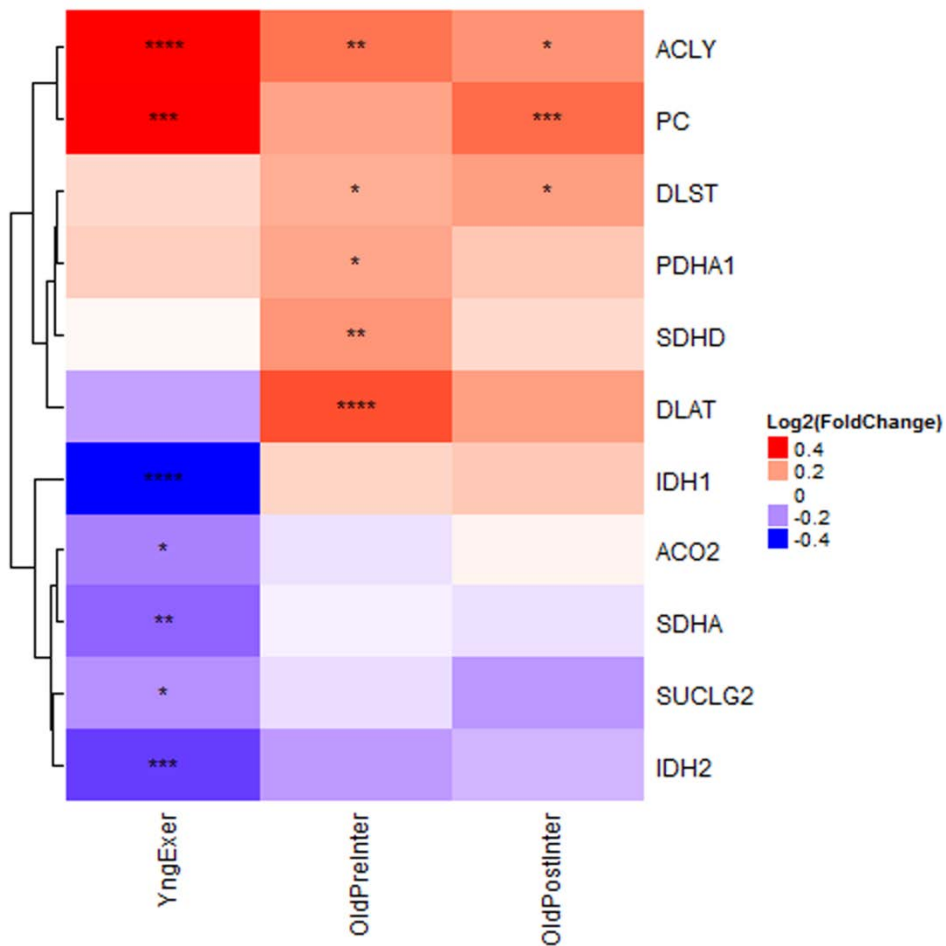

**Supplemental Figure 8.** The heatmap shows post exercise fold changes for genes related to tricarboxylic acid cycle in young, old, and old post-supplementation relative to their respective baseline transcript levels. A positive fold change (red) indicates upregulated after exercise, and a negative fold change (blue) indicated downregulated after exercise. \* denotes where the fold change was statistically significant from pre-exercise ( $p \leq 0.05$ ).



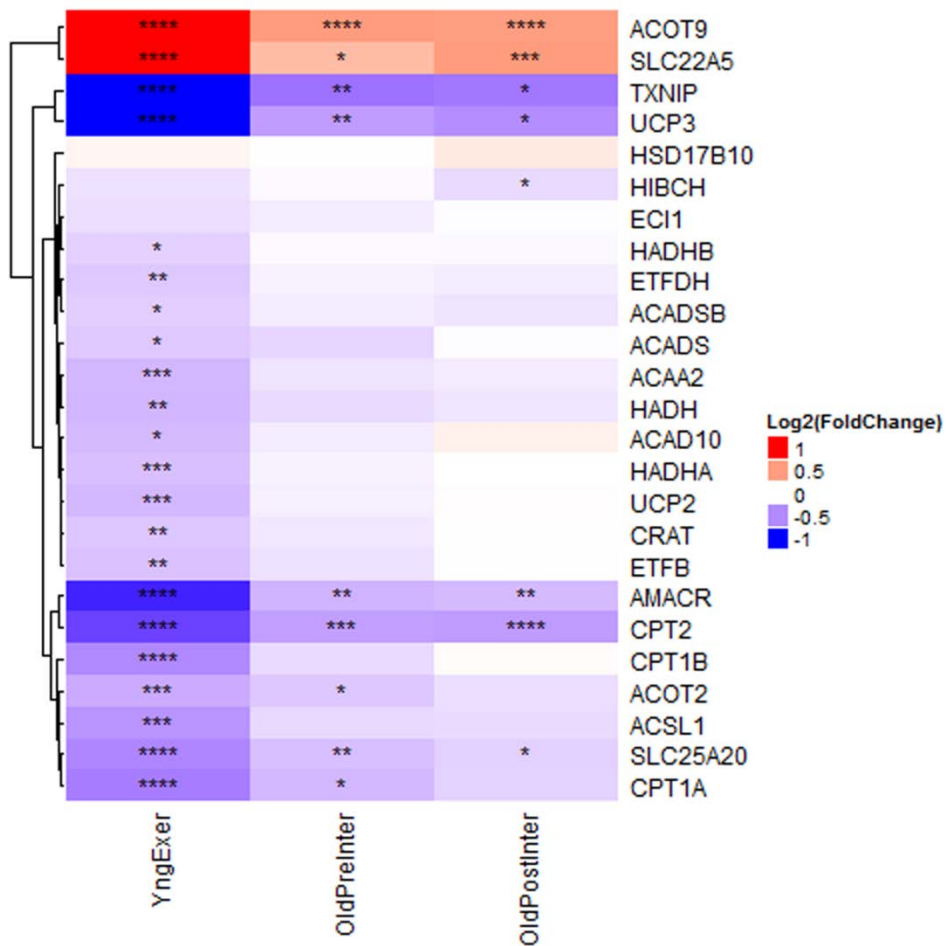

**Supplemental Figure 9.** The heatmap shows post exercise fold changes for genes related to lipid metabolism in young, old, and old post-supplementation relative to their respective baseline transcript levels. A positive fold change (red) indicates upregulated after exercise, and a negative fold change (blue) indicated downregulated after exercise. \* denotes where the fold change was statistically

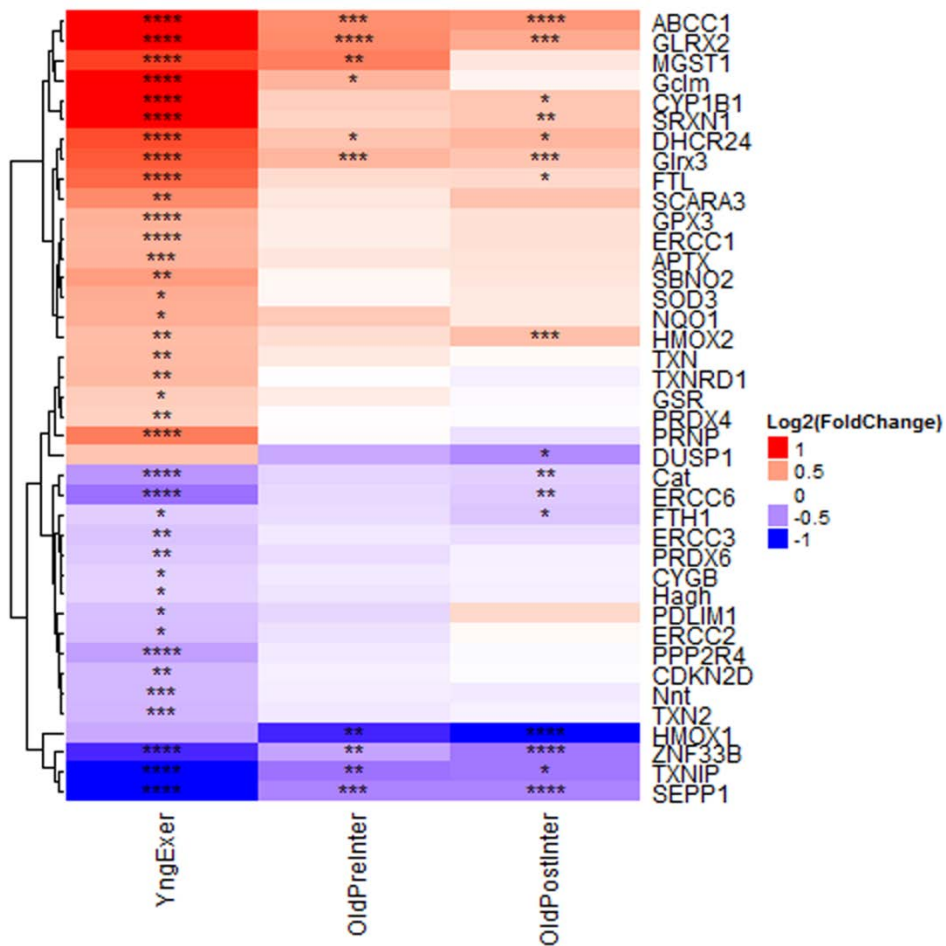

**Supplemental Figure 10.** The heatmap shows post exercise fold changes for genes related to oxidative stress in young, old, and old post-supplementation relative to their respective baseline transcript levels. A positive fold change (red) indicates upregulated after exercise, and a negative fold change (blue) indicated downregulated after exercise. \* denotes where the fold change was statistically significant from pre-exercise ( $p \leq 0.05$ ).

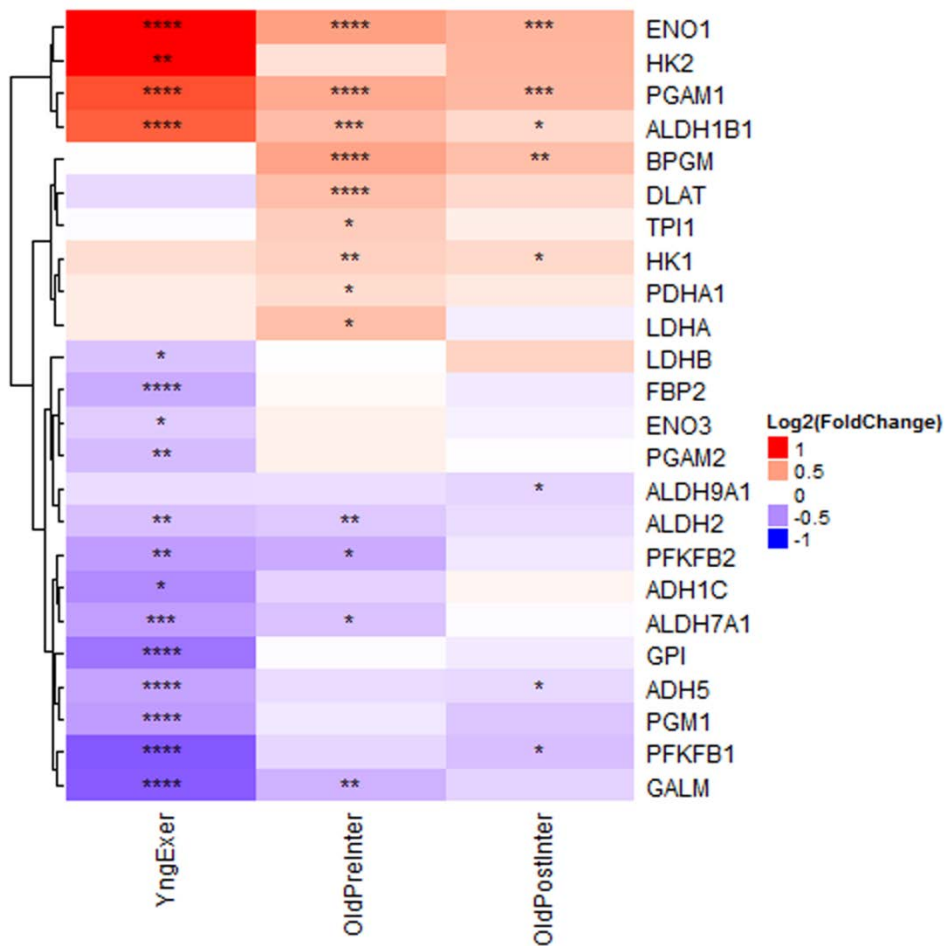

**Supplemental Figure 11.** The heatmap shows post exercise fold changes for genes related to glycolysis in young, old, and old post-supplementation relative to their respective baseline transcript levels. A positive fold change (red) indicates upregulated after exercise, and a negative fold change (blue) indicated downregulated after exercise. \* denotes where the fold change was statistically significant from pre-exercise ( $p \leq 0.05$ ).

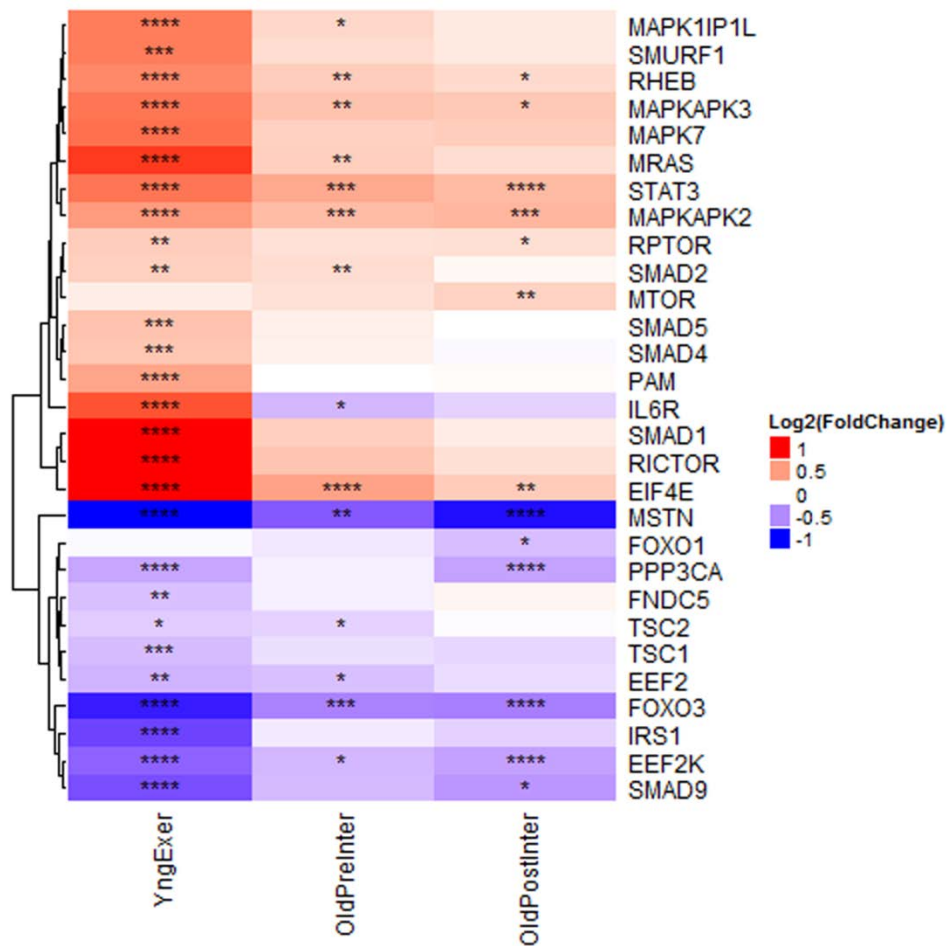

**Supplemental Figure 12.** The heatmap shows post exercise fold changes for genes related to protein turnover in young, old, and old post-supplementation relative to their respective baseline transcript levels. A positive fold change (red) indicates upregulated after exercise, and a negative fold change (blue) indicated downregulated after exercise. \* denotes where the fold change was statistically significant from pre-exercise ( $p \leq 0.05$ ).

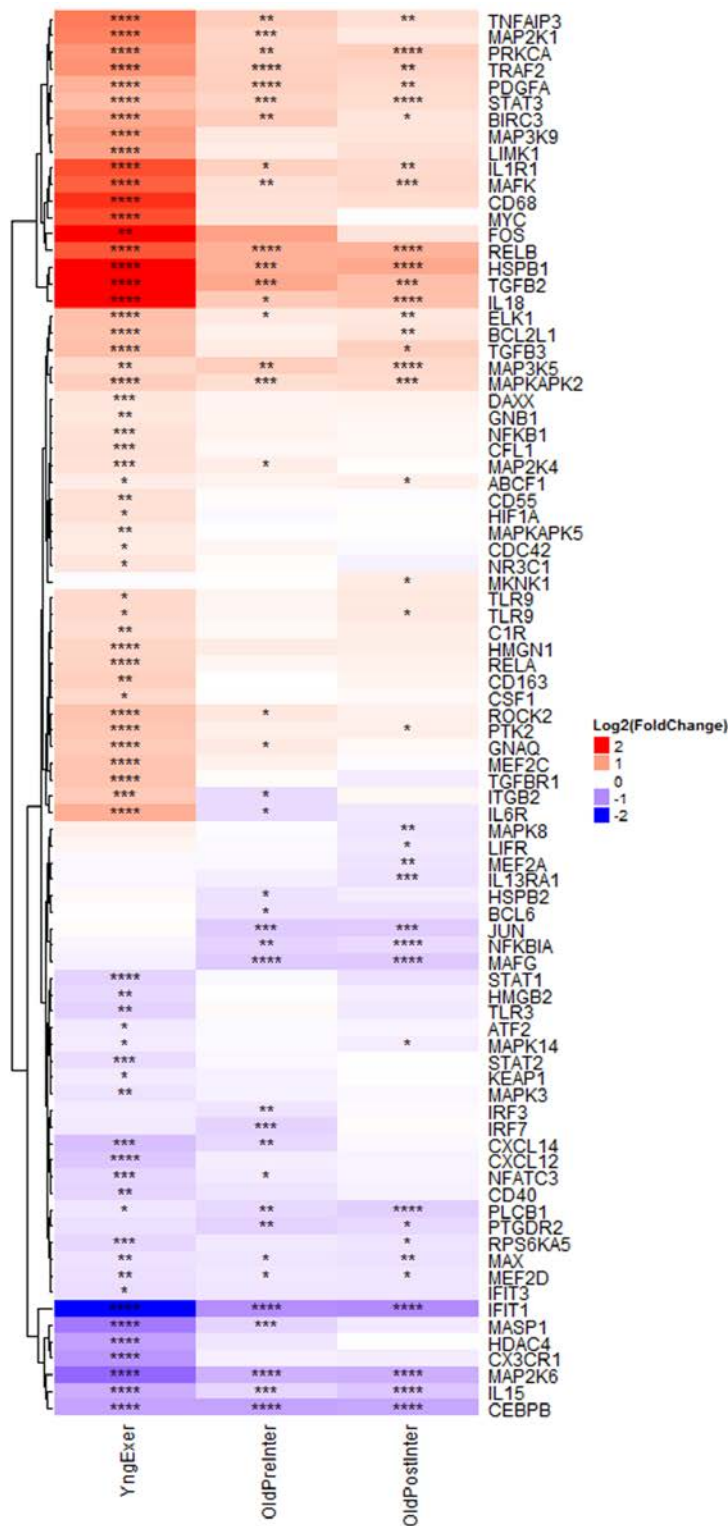

**Supplemental Figure 13.** The heatmap shows post exercise fold changes for genes related to inflammation in young, old, and old post-supplementation relative to their respective baseline transcript levels. A positive fold change (red) indicates upregulated after exercise, and a negative fold change (blue) indicated downregulated after exercise. \* denotes where the fold change was statistically significant from pre-exercise ( $p < 0.05$ ).

## Supplemental Tables

**Supplemental Table 1. Gene expression assays.**

| Gene Symbol                                                                                                           | Gene Name                                                            | Assay ID      | Context Sequence               | Probe Dye |
|-----------------------------------------------------------------------------------------------------------------------|----------------------------------------------------------------------|---------------|--------------------------------|-----------|
| <ul style="list-style-type: none"> <li><b>Gene targets with HPRT1 reference gene (4326321E, VIC probe)</b></li> </ul> |                                                                      |               |                                |           |
| SLN                                                                                                                   | sarcolipin                                                           | Hs01888464_s1 | ACACGGTCTGCAACC<br>AAACTCTAAT  | FAM       |
| FST                                                                                                                   | follistatin                                                          | Hs00246256_m1 | TGCCCAGGCTGGGAA<br>CTGCTGGCTC  | FAM       |
| CAPN1                                                                                                                 | calpain 1, (mu/I)<br>large subunit                                   | Hs00559804_m1 | AACTACCCAGCCACC<br>TTCTGGGTGA  | FAM       |
| TRIM63                                                                                                                | tripartite motif<br>containing 63, E3<br>ubiquitin protein<br>ligase | Hs00822397_m1 | GTCGAGTGACCAAGG<br>AGAACAGTCA  | FAM       |
| MYOD1                                                                                                                 | myogenic<br>differentiation 1                                        | Hs02330075_g1 | CGACGGCATGATGGA<br>CTACAGCGGC  | FAM       |
| <ul style="list-style-type: none"> <li><b>Gene targets with B2M reference gene (4326319E, VIC probe)</b></li> </ul>   |                                                                      |               |                                |           |
| B2M                                                                                                                   | Beta 2<br>microglobulin                                              |               |                                |           |
| MSTN                                                                                                                  | myostatin                                                            | Hs00976237_m1 | ATGCCTACAGAGTCT<br>GATTTTCTAA  | FAM       |
| CAPN2                                                                                                                 | calpain 2, (m/II)<br>large subunit                                   | Hs00965097_m1 | CGGAGCCGAGGAGGT<br>TGAAAGTAAC  | FAM       |
| FBXO32                                                                                                                | F-box protein 32                                                     | Hs01041408_m1 | TCCGAGCGGCAGATC<br>CGCAAACGAT  | FAM       |
| FOXO3B,<br>FOXO3                                                                                                      | forkhead box O3B<br>pseudogene,<br>forkhead box O3                   | Hs00921424_m1 | GGGCAAAGCAGACCC<br>TCAAACGTGAC | FAM       |

**Supplemental Table 2. Gene identities of elements in each section of the Venn Diagram in Figure 5.**  
See Supplemental File 2.
