# Supplementary material for: Influence of omega-3 fatty acids on skeletal muscle protein metabolism and mitochondrial bioenergetics in older adults
Source: Aging (Albany NY). 2017 Apr 5;9(4):1096–115. doi: 10.18632/aging.101210 (PMC5425117; doi:10.18632/aging.101210)
Supplement: Supplementary file 2 [file aging-09-1096-s002.xlsx]

## Sheet: Venn_genes
Elements only in "Young":	Elements only in "Old":	Elements only in "Old n3-PUFA":	Common elements in "Young" and "Old":	Common elements in "Young", "Old" and "Old n3-PUFA":	Common elements in "Old" and "Old n3-PUFA":	Common elements in "Young" and "Old n3-PUFA":
ABRA	CYCS	AGBL1	ABCA1	ABTB2	AC079586.1	AC115115.2
AAGAB	CD160	AC123886.2	AC137932.6	ABCC1	ANKRD20A5P	ACTN3
AAK1	TFRC	BMP6	AC017101.10	ABCC6	ARRDC3	ADAM23
ABCC9	GADL1	C1QTNF6	ACOT9	AC007970.1	CACNG1	CD38
ABCE1	IRX3	HOOK2	ACSL4	ABHD2	CEBPD	AGMAT
ABHD10	MAP3K5	CALM1	C20orf194	AC068138.1	CNN1	ANKRD13B
ABHD12	MGST1	CALML6	AP002884.3	ACSBG1	CTD-2026K11.1	ANKRD20A19P
ABHD16A	MSS51	CENPQ	APCDD1	ATP2B2	PAQR4	ANKRD52
ABHD3	AL356356.1	MLF1	ARHGEF37	ACVR2B-AS1	PKMYT1	ASB14
ABHD4	C14orf180	CTD-3064M3.7	ASB5	ADIPOR2	SLC14A1	ATP2A1
ABHD5	NOTUM	NOS1	ATP1B4	CDC37L1	FAM83G	BCL2
ABI1	MAST3	CXCL9	ATP2A2	AL139819.1	TUBG1	ATP6V0B
ABI2	RP11-169K16.4	PRODH	FAM210A	CNKSR2	KLF10	C1orf127
AC079922.3	RP11-345K20.2	DOPEY2	BIRC3	AMOT	LAMB3	CCDC110
AC005606.15	RP11-466A19.1	DUSP1	BZRAP1	AMOTL1	LRRC56	CDCA7L
AC007283.5	RP5-1092A3.4	FAM212A	C12orf23	AMPD1	ARHGAP11B	LRRC37A7P
AC007383.3	UBC	FKBP2	C1orf132	AMPD2	HMOX1	CDK2AP2
AC007563.5	XYLT1	FRZB	CAMK2D	AMPD3	GDA	METTL21EP
AC008731.1	ZNF418	MYLK4	CCT2	ANK3	RP11-87E22.2	CDNF
AC009506.1		LSMEM1	CCT6A	CMC2	SERPINI1	CHAF1B
AC010976.2		HBP1	LINC00312	AQP4	SPSB1	CHORDC1
AC011526.1		PRKAG3	CNIH4	ASB15	RP1-170O19.22	CLASP2
AC015987.2		IER5	CNTFR	ARHGAP24	RP11-739N10.1	CREB3L4
AC040173.1		IGSF11	CTC-338M12.6	ARNTL	THRSP	CTAGE5
AC026703.1		RP11-731C17.2	CTD-2256P15.4	ARRDC2	ZFP36	CTD-2369P2.5
AC034187.2		MET	CTNNAL1	ART1		CTD-3074O7.2
AP000695.6		MMD	CTPS1	ART5		CYP4X1
AC090186.1		MRPS12	CYLD	ASB4		DDI2
ARL5A		MYH4	DAPK2	ATF3		RBM20
ASB11		INPP5J	DBNDD1	ATP13A3		RP11-38P22.2
AC091814.3		NR1I3	DCAF13	AUTS2		SMCO1
AC093627.10		PBX3	DNAJA1	B3GALT1		FAM131B
AC093734.1		PHOSPHO1	DSEL	BARD1		FAM76A
AC107081.5		PPP1R3B	DYNLT1	BCAR3		FAM86DP
AC109828.1		PROX1	EFR3B	BEND3		FKBP4
AC110615.1		RGS10	EIF4A1	C12orf39		GALE
AC117395.1		RP11-134G8.2	ERO1L	C12orf5		GPD2
AC141586.5		RP11-395P17.3	FAAH	C8orf22		P2RY1
AC144449.1		RP11-471B22.2	FAM13C	C8orf58		PYGO1
ACACA		SH3RF2	FAM174A	CALU		HYOU1
ACACB		SLC37A1	TSPAN5	CAMKK1		GREM2
ACBD4		SPON2	FSD1L	KLHL34		RP1-39G22.7
ACCS		SPTBN4	GAREML	CBFB		ITGA7
ACHE		SRPX2	GDPD5	CCDC136		SKIL
ACKR3		TBC1D4	GLRX2	CCDC152		JMJD6
ACVR1		TEX2	GNL3	CD151		KBTBD13
ACOT11		TAL2	GPSM2	LMOD1		KPNA2
ACOX2		TOMM40L	GPT2	CEBPB		CD276
ACP6		TPT1P9	GRAMD1B	CENPN		LIPT2
ACPL2		ZNF711	GTF2IRD1	MAP3K15		LRP4
ACSF2			HERC6	MSTN		CRIM1
ACSL3			HNRNPAB	CHRNA10		MPP7
ACSM5			AKR1C1	CHST3		MPV17L2
ACSS3			HSP90AA1	CLCN1		MROH7
ACTA2			HSPA4	CMBL		MRPL4
ACTA2-AS1			IDI1	MTFP1		MYH1
ACTR3			RP11-125B21.2	COL28A1		MYOM3
ACTR3B			IL31RA	COL4A3		NCOA3
ACVR2B			ATP1A1	COL4A4		NUSAP1
ADAL			ATP1A1OS	CTC-297N7.11		ODF3L2
ADAM17			IVNS1ABP	COLQ		PDZRN3
ADAMTS1			JUP	COMTD1		PGBD5
ADAMTS10			KCNB1	CTC-297N7.7		PITX1
ADAMTS19			KIAA1671	MYLK2		PLCL1
ADAMTSL5			KLF15	CREB5		PRKCA
ADCK3			KPNA1	CRYAB		PRR16
C9orf129			LARP4	NANOS1		RAPGEFL1
ADH1C			LBX1-AS1	CSRP3		RORA
C1orf170			LDLR	CTC-338M12.1		RP11-161H23.5
AKAP7			LIMS1	CTD-2325A15.5		RP11-22P6.3
AFF1			LINC00963	CTD-2369P2.4		RP11-293P20.2
AGO2			CEP170B	CXCR6		OSBPL7
AGPAT9			LRRC30	PEX26		RP11-407N17.3
AGPS			2015-03-05	RHOBTB1		RP1-225E12.3
AGT			AC025171.1	DEPTOR		RP4-816N1.7
AHSA1			MRM1	DFNA5		RP5-940J5.6
CCDC58			CYR61	DIAPH1		RPS6KL1
AK4			EGR1	DIXDC1		RSC1A1
AKAP9			NDUFAF4	DNAJA4		RSPO3
AKIRIN1			MEST	RP11-307B6.3		SEPN1
AKIRIN2			NFIL3	DPH2		SGCG
CHIC1			NIFK	DUSP14		SLC12A4
AKR1B15			CCDC39	DUSP8		SLC12A6
AKR1C2			LGR5	DYRK1B		SLC22A5
AL161668.5			ODC1	RP11-253E3.3		SLC25A19
AL161784.1			OTUD1	EHD1		SLC30A1
AL354898.1			PAIP2B	SLC16A3		SOX6
CNTLN			PDCD11	ENAH		SREBF2
AL357673.1			DNASE2	ENDOD1		TOMM40
AL391152.1			PDGFA	EPHB1		TRAF7
ALDH18A1			PFKFB4	SPTSSA		TTC39B
ALDH1A1			PIK3IP1	RP4-539M6.19		TUBA1C
ALDH1B1			PIM1	FAM136A		TXLNB
ALDH5A1			PLEKHA1	FAM166A		UNC13B
ALG3			PLXNC1	FAM46C		WDR4
ALG9			PNO1	SLC16A1		ZC3H6
ALKBH2			PNPLA8	SLC38A3		ZNF33B
ALKBH8			PPFIBP2	SMTNL2
ALPK3			PVRIG	FLNC
ALS2CL			RCAN1	FNBP1
ALYREF			REEP2	FOXO3
AMACR			RNF115	FRAS1
AMD1			RP11-299J3.8	ST8SIA5
AMDHD2			RP11-64B16.2	FYTTD1
AMMECR1L			SATB2	GAB1
AMT			SCN2B	GADD45G
AMY2B			SGK1	GFOD1
ANGPT1			SH3BP5	GHR
ANGPTL2			SLC25A33	GPIHBP1
ANKFY1			SLC25A34	TUBA8
CYP4B1			SLC38A1	GRK4
ANKRD13A			SLC39A10	HCN1
ANKRD17			SLC43A1	HERPUD1
ANKRD32			SMPX	HFE2
ANKRD35			SNAPC2	HIVEP3
ANKRD37			SNORA67	NPHP1
ANKRD54			SOX13	NREP
ANKUB1			SRPK1	HPCAL4
ANKZF1			SS18L1	HSPA12A
ANO6			STK17A	HSPA1A
ANXA2P2			PTK2B	HSPA1B
ANXA5			SYBU	HSPA1L
AP001372.2			RUNX1	HSPB1
ARHGAP18			TMEM108	HSPB7
AP5M1			SIK1	HSPD1
APBA1			TNFAIP3	HSPE1
APEX1			TOB1-AS1	HSPH1
APLN			TRIM7	IDH3A
APOL6			TSC22D3	ANKRD1
DHCR24			TENM3	IFIT1
AQP7			UCK2	IFRD1
ARAP1			VLDLR	RP11-390E23.3
ARFGAP3			WDR1	IL12RB2
ARG2			WDR62	IL18
ARHGAP1			XIRP2	INPP4B
ARHGAP10			WSCD1	ITGAV
ARHGAP17			ZBTB16	ITIH4
ARHGAP19			ZNF367	ITIH4-AS1
ARHGAP23				ITIH6
ARHGAP26				KB-1471A8.1
ARHGAP28				KBTBD8
CYP27A1				KCNQ4
ARHGAP5				KIAA0226
ARHGDIA				STARD4-AS1
ARHGEF3				KLHL33
ARHGEF9				KY
ARID5A				LARGE
ARL10				LIN9
ARL17B				LINC00702
ARL6IP5				LMCD1
ARL8B				LMO1
ARMCX1				LRFN4
ARMCX3				LYAR
ARMCX5				MAP2K3
ARMCX6				MAP2K6
ARPC5L				METTL1
ARPP19				METTL7B
ARRDC4				MID1IP1
ARSG				ABCG1
ART3				MOB3B
ASAP1				ACTC1
ASAP3				MT1X
ASB10				AEN
B3GALTL				HPN
ASB16				ANKRD2
ASB16-AS1				MUSTN1
ASTN2				MYLK3
ASUN				NEK10
ASXL2				KLHL40
ATF1				NME1
ATF7IP				NMRK2
ATG3				NPAS2
ATG4A				NR1D1
ATP11B				NR4A3
ATP1A2				NRG4
ATP1B1				NT5DC3
ATP1B3				CDKN1A
ATP2B1				NUDT4
ATP2B4				NUDT4P1
ENPP5				CHAD
ATP6AP1L				OSGIN1
ATP6V0A2				P2RX5
ATP6V0E2				PANX1
ATP7A				PAQR9
ATP8A1				CSPG4
ATP9A				DDIT4
ATXN10				DDX11
ATXN1L				PDE11A
ATXN7L3				PFKFB3
AXIN1				EGLN3
AZIN1				PHKG1
B3GALT6				PITX3
B3GAT3				PLA2G4F
B3GNT1				PLEKHO1
B3GNT5				PPARGC1B
B4GALT1				PPFIA4
B4GALT3				PPP1R14B
B4GALT5				PPP1R27
BACE2				GRAMD3
BACH2				PRKAG2
BAG3				PRKCE
BAHD1				PRPH2
BAZ1A				HOXA4
BAZ2B				PTPRJ
BBS4				PVR
BBS9				RAB3IP
FBXL4				RASSF5
BCAR1				RCSD1
BCAS2				RELB
BCCIP				RFTN1
BCKDHB				RHOB
FBXO32				RNF150
BCL2L1				KLF13
BCL7A				RORC
BCL7B				PHLDA3
BCO2				RP11-110G21.1
FRMD3				PLEKHF1
FRMPD1				RP11-23N2.4
BHLHB9				RP11-309L24.2
BIN3				RP11-326A19.5
BLOC1S2				RP11-343H19.2
BLOC1S3				RP11-388P9.2
BLOC1S4				RP11-47L3.1
BLOC1S5-TXNDC5				RP11-480G7.1
BLOC1S6				RP11-509E16.1
BMP1				RP11-760H22.2
BMP2K				RP11-762H8.4
BMPR2				RP11-800A3.4
BOP1				RP11-856F16.2
GNPNAT1				RP11-861E21.2
BRCA1				RP1-193H18.2
BRD4				RP1-261G23.7
BRIX1				RP5-966M1.6
BYSL				RRAS2
BZW1				RRP12
C10orf10				RRS1
C10orf12				PHLDA1
C10orf2				MT1E
GPCPD1				MYBPH
C11orf24				SEC14L5
C11orf68				MYH9
C11orf71				SEPP1
C11orf84				SHB
C11orf89				SIPA1L2
C12orf44				RP11-145A3.1
GREB1				RAB15
GREM1				SLC25A15
C16orf86				SLC27A4
C16orf91				SLC36A1
C18orf25				SLC38A4
C18orf8				SLC7A1
C19orf10				SMC5
C1orf198				SNN
C1orf213				SOCS7
C1orf51				SPIRE1
C1orf85				SPOCK1
C21orf119				SRPRB
C2CD2L				ST3GAL6
C2CD5				STIP1
C2orf69				STRN
C4orf46				SUMF2
C6orf1				SLC43A2
C6orf48				RP11-442H21.2
C6orf57				TESK2
C7orf43				TFEB
C8orf33				TGFB2
C9orf41				THBS1
C9orf89				THOC6
CA14				THSD4
CACNA1S				TLE1
CACNG6				TMEM110-MUSTN1
CALM2				TMEM135
CAMK2G				TMEM159
KIAA1161				SCD
CAMSAP1				TMEM43
CAPN15				TMEM52
CAPN2				TOB2
KLHL24				TP53INP2
CARF				TRAF3
CASC7				TRIB1
CASKIN1				TSPAN8
CASKIN2				TEP1
CASP3				TUBA4A
CASP7				TUBB4B
CASQ2				TXNIP
CAST				TIMP1
CAV3				UGT3A1
CCDC101				TNC
CCDC102B				USP28
CCDC112				TNFRSF12A
CCDC117				USP6
CCDC13				VEGFA
CCDC180				VGLL2
CCDC28A				VSIG10
KRT31				WIPF3
CCDC77				XIRP1
CCDC86				Y_RNA
CCHCR1				UNC13C
LDLRAD4				YPEL1
KCNA7				ZNF469
CCRN4L				ZNF774
CCT3
CCT4
CCT5
CCT8
CD164
KLHL38
CD274
KMO
CD320
CD36
LRRC3B
CD3EAP
CD63
CD97
MAPK6
MASP1
CDC42EP3
CDC42SE1
MDFIC
CDH15
CDK14
CDK18
CDK4
CDKL3
CDKN1B
MICAL2
CDR2
CDV3
CEACAM19
CEBPG
CELF2
CELSR2
CENPC
CEP112
CEP68
CEP85
CEP85L
CES2
MLEC
CHAC2
CHAF1A
CHCHD4
CHD1L
CHD4
CHD7
CLIC4
CHMP4B
CHP1
CHRDL2
CHRNA5
CIAPIN1
CIRH1A
CKAP4
CKAP5
CLCC1
CLCN5
CLEC16A
CLIP1
CLK1
CLK4
CLMN
CLPTM1L
CMPK2
CMTM4
CNRIP1
CNST
COA7
COCH
COL11A2
HK2
COL4A5
CRYZ
COQ10A
COQ10B
COQ7
CORO1C
NMNAT1
CPEB3
CPEB4
CPED1
CPT1A
CPT1B
CPT2
CRADD
NXPE3
CROT
CRY1
CRYM
CSGALNACT2
CSNK1A1
CSNK1G3
OR7E47P
CSRNP1
CTA-125H2.2
CTA-221G9.11
CTB-174O21.2
OTUD6B
PDP1
CTB-89H12.4
CTBP2
CTC-250I14.3
CTC-264K15.6
CTC-273B12.7
PGM2L1
CTC-338M12.5
CTC-467M3.1
CTC-479C5.10
CTC-506B8.1
CTC-518P12.6
CTD-2033A16.3
CTD-2083E4.7
CTD-2132N18.3
DDIT4L
CTD-2410N18.4
CTD-2541J13.2
CTD-2545M3.8
CTD-3064M3.4
CTD-3185P2.1
CTDSP2
CTNNA1
CTPS2
CTSB
CTSC
CTSF
CTTN
CTU2
CTXN3
CUL1
CX3CR1
CXCL14
CXorf24
CXXC5
CYB5D2
CYB5R2
CYB5RL
DNAJB4
CYFIP1
CYFIP2
ORAI1
CYP2J2
CYP4V2
CYP51A1
CYSTM1
CYTH1
CYTH2
DAPK3
DCAF15
DCAF16
DCAF4
DDAH1
DUSP10
DUSP19
DDN
DDX21
DDX27
DDX31
DDX39A
DDX3X
DDX52
DDX56
DDX58
PLEKHN1
DEGS1
RNF128
DENND5A
DENND5B
DERL2
DGKD
DGKZ
DGKZP1
SLITRK4
DHRS3
DHX15
DHX33
DHX34
DHX37
DICER1-AS1
DIEXF
DIMT1
DKC1
DLG4
DLG5
DLGAP4
RP11-101E13.5
DMRTA1
DMWD
DMXL2
RP11-173P15.3
DNAJB1
DNAJB5
DNAJC12
DNAJC16
DNAJC5
DND1
DNMBP
DNMBP-AS1
DNTTIP2
DOK5
DOK7
DOT1L
DPF3
RASL12
DPM2
DPY19L3
DSCR3
DST
DTNB
DTNBP1
DUS3L
DUSP16
RP11-474G23.2
DUSP26
DUSP27
DYNLL1
DYNLT3
DYRK1A
E2F3
E2F4
EAF1-AS1
RP11-49I4.3
ECHDC2
ECHDC3
EDC4
EEA1
FAM101B
RP11-111M22.3
EEF2K
EEPD1
RP11-807G9.2
EFNB2
EFR3A
EIF2AK3
EIF2B4
EIF3J
EIF4E
SH2D1B
EIF4G2
EIF5
EIF6
ELF1
ELF2
ELK1
ELL2
ELMOD1
EMC8
EML1
EMP1
ENO1
ENO1P4
SLC4A4
ENTPD4
FGF13
EPDR1
EPT1
ERAP1
ERBB4
ERCC6
ERCC6-PGBD3
ERI2
ERLIN1
ERVK13-1
ESR1
ETF1
EXOC2
EXOC5
EXOC6
EXOSC4
EXTL1
EZR
FADS1
FADS2
FADS3
FAM104A
FAM105B
FAM110B
FAM117B
FAM118A
FAM127C
FAM131A
FAM13A
FAM13A-AS1
FAM13B
FAM161A
FAM168A
RXRG
FAM177A1
FAM179B
FAM184B
FAM208B
FAM20B
FAM214A
FAM214B
FAM217B
FAM219A
FAM220A
FAM222A
FAM222B
FAM227B
FAM35A
TMEM110
FAM49B
FAM50B
TMEM55A
FAM63A
FAM65B
FAM78A
FAM86A
TMEM9
FAM98A
FANCM
FARSA
FASTKD2
GNG12
FAXDC2
FBLIM1
FBXO3
FBXO33
FBXO40
FBXO45
FCHSD2
FDFT1
TPRG1
FERMT2
FGD6
FGF6
FGFR1
FHL3
FHOD3
SNHG16
FICD
FIGN
FILIP1L
FKBP1A
FKBP5
FLII
FMNL2
FMO2
FNDC3B
FNIP2
FOXRED2
FRAT1
FRK
ZBTB18
ZNF273
FUBP1
FUCA1
FUNDC1
FUT11
HENMT1
FYCO1
FZD4
FZD9
G2E3
GABARAPL1
GABPB1
GADD45B
GALC
GALM
GALNT2
GANC
HOMER1
GAPVD1
GAR1
GAREM
GARS
GART
GAS8
GATAD2A
GBA
GCLM
GDNF
GEN1
GFOD2
GGT7
GIPC2
GIT1
GLCE
GLRB
GLRX3
GLUL
GMFB
GNA12
GNA13
GNAI1
GNAL
GNAQ
IPMK
GNG7
GNL2
ITGA8
GOLPH3L
GP1BA
GPAM
GPATCH11
GPATCH4
GPATCH8
GPC4
GPD1
GPI
GPR133
GPRC5C
TTC40
GRIP2
LGR4
GRWD1
MARK1
GTF2E2
GTF2IRD1P1
GTF3C2
MCC
GXYLT2
GYG1
H2AFX
H2AFY2
H6PD
HABP2
HBEGF
METTL20
HDAC11
HDAC2
HDAC9
HEATR1
A4GALT
MTHFD2
HERC4
HEY1
HEYL
HHATL
HIF3A
NAV3
HIP1R
HIPK1
HIPK2
HIST1H4H
HIVEP1
AC006369.2
PCYOX1
HLCS
HLF
HLX
HM13
HMCN2
HMGA1
HNRNPH1
HNRNPH3
HNRNPLL
HNRNPR
HOMER2
HOXA10
HOXA10-AS
HOXA11
HOXA11-AS
HOXA3
HOXA7
HOXA9
PPP3R1
HOXA-AS3
PPP4R2
HOXC6
PTER
HPS3
HS1BP3
HSD17B12
HSF4
HSP90AB1
HSPA13
HSPA5
HSPA8
HSPA9
RET
HSPB8
HSPE1-MOB4
HTATIP2
RFXAP
HTRA3
IAH1
IARS
IDH1
IER3
ANXA2
IFNGR1
IFT81
IGFBP5
IGSF9B
IL15
IL17D
IL1R1
IL20RB
NPR3
RP11-766F14.2
IL6R
ILF2
ING2
RP3-486I3.5
INPP5F
INSIG1
INSR
INTS6
SERPINE2
IPP
IPPK
IQCJ-SCHIP1
IRAK1
IRAK2
IRS1
IST1
ITFG1
ITGA5
ITGA6
SLC12A2
ITGB1
ITPKC
IWS1
JADE1
JADE2
JAGN1
JAK2
JARID2
JAZF1
JMJD7-PLA2G4B
JPH2
JUND
KAL1
KALRN
KANSL2
KATNA1
KB-1572G7.2
KBTBD2
KCNC4
KCNS3
KCNT1
KCTD5
KCTD7
KDM5C
KDR
KHK
KIAA0020
KIAA0195
KIAA0247
KIAA0408
KIAA0430
KIAA0513
KIAA0754
KIAA1009
KIAA1109
KIF21A
KIF22
KLC1
KLF11
KLF5
KLF6
KLF9
TET1
KLHDC3
KLHDC8B
KLHL18
KLHL21
KLHL25
KLHL26
KLHL29
TMEM182
KLHL7
KNTC1
KPNB1
KRBA1
KREMEN1
L2HGDH
L3HYPDH
LA16c-306E5.3
LAMB2
LAMC1
LAMP2
LAPTM4B
LARP1B
LARP6
LBR
LBX1
LCLAT1
LCMT2
TTC32
CCND1
LDOC1L
LETM1
CCNG2
LGALSL
UHRF1BP1L
LHFPL5
LIG3
LIG4
LIMA1
LIMK1
CD44
LINC00346
LINC00476
LINC00641
LINC00957
LINC00984
LINGO4
LMBR1
LMNA
LMO7
ZNF100
ZNF518B
CAPN6
ZNF680
LPGAT1
AC074212.5
LRFN3
LRIG1
LRP12
LRP2BP
LRP6
LRRC14B
LRRC20
LRRC25
LRRC59
LRRC66
LRRC8B
LRRD1
LRRFIP1
LRRFIP2
LRRK2
LRRN1
LRSAM1
LSG1
LSM7
CHPF2
LTV1
LUZP6
AGTRAP
CHRNG
CLEC2B
APOD
LYSMD2
ARVCF
MACF1
MAEA
MAFA
MAFB
MAFK
MAGI2
MAK16
MAMDC2
MAML3
MAMSTR
BTG2
MAP2K1
MAP3K8
MAP3K9
MAP4K4
MAP7D3
MAPK1IP1L
MAPK7
MAPKAPK2
MAPKAPK3
MAPKBP1
MAPRE1
MAPRE2
2015-03-01
2015-03-03
2015-03-07
2015-03-08
MARCKSL1
MARS2
LOXL2
MAST4
MAT2A
MBNL2
MBTD1
DDR1
MCM2
MCMBP
MDN1
MED22
MED25
MED27
MEF2C
MEF2C-AS1
MEGF10
MEIS1
MEMO1
FTL
METTL7A
MFAP3L
MFGE8
MFHAS1
MFSD12
MFSD9
MGLL
MGST2
MIB1
MICAL3
MICALL1
HDAC4
MID2
MIDN
MIR3661
ABCA7
MKL1
MKL2
MKS1
MLIP
MLLT3
MLXIPL
MLYCD
MMAA
MMADHC
ABR
MN1
MORF4L2
MOSPD1
AC011530.4
MPPE1
MPPED2
MPRIP
MPV17L
MRAS
AC074212.6
MRPL23-AS1
MRTO4
MSANTD3-TMEFF1
MSANTD4
MSN
MTBP
MTERFD1
AKR1C3
MTPN
MTRR
MTSS1
MTUS1
MUM1L1
MVB12B
EMILIN1
MYADML2
MYC
ARMCX4
MYL12A
FAM102A
MYLIP
MYO18A
MYO18B
MYO5C
BATF2
MYPN
MYRIP
NAA15
NAA25
NAA50
NAA60
BEST3
NACC1
BGN
NAGPA
NANS
NAT10
NAT6
NAT9
NBAS
NCAPG2
NCKAP1
NCOA1
NDUFA6-AS1
NEDD4
NEIL2
NEO1
NEXN
NEXN-AS1
NFIA
FOS
NIFK-AS1
NIP7
NIPA2
NIPAL3
NKX3-1
NME1-NME2
NME2
NMNAT3
NOB1
NOLC1
NOM1
NOP14
NOP16
NOP2
NOP56
NOP58
NPC1
NPM1
NPM1P27
NQO2
NR1D2
CD68
NR2C2AP
NR2F6
NR3C2
NRAP
NSMCE4A
NSUN5
NT5DC1
NTF4
NUDT12
NUDT19
NUDT7
NUMA1
NUP188
NUPR1
OAT
OBSL1
OGFOD1
OGT
CMKLR1
MAP3K14-AS1
OSBPL2
OSBPL6
OSBPL8
OSBPL9
OSER1
OSER1-AS1
OSGEP
OSGEPL1
OSMR
OSTC
P2RX5-TAX1BP3
P2RY2
P4HA1
P4HA2
PACSIN2
PACSIN3
PAFAH1B1
PAICS
PAK1IP1
PAK2
PALLD
PAN2
PANK1
PANK3
PAPOLA
PARD3
PARP15
PARVA
PAX3
PBDC1
PBXIP1
IER2
CYP1B1
DAPK1
FNDC1
PCGF5
PCMTD1
PCNA
PCSK6
DMPK
PDE4A
PDE4D
PDE8A
PDGFB
PDGFRA
PDGFRL
PDK2
PDLIM3
PDSS1
PDXP
PEBP4
PEG10
PER1
PER3
PES1
PEX11A
PFDN2
PFKFB1
PFN2
PGAM1
PGAM5
PGBD3
PGRMC2
PHACTR4
PHF7
ERRFI1
PHKA2
ETV5
PHLPP2
PHYHIPL
PHYKPL
PI4K2A
PICALM
PIGW
PIK3C2B
PIK3CB
PILRB
PINX1
PIP5K1B
PITPNB
PITPNM1
PITPNM2
PITX2
PIWIL2
PJA2
PKD1L1
PKD2L2
PKIG
PKNOX1
PKNOX2
PKP2
PLA2G4B
PLAA
PLAGL2
PLAU
PLBD1
PLBD2
FASN
PLCL2
PLD6
PLEKHH3
PLEKHM1
PLEKHM3
PLIN3
PLIN4
PLOD3
PLXNA1
PLXNA2
FLNA
PMM2
PNCK
PNPLA7
POGLUT1
POLL
POLR1A
POLR1C
FRMD8
POLR3D
POMT1
POPDC2
GADD45A
PPAN
PPAN-P2RY11
PPAP2A
PPAP2B
PPAPDC3
PPARD
PPAT
PPIF
PPIL1
PPM1B
PPM1D
PPM1K
PPM1N
PPME1
PPP1R10
PPP1R15A
PPP1R26
PPP2CA
PPP2CB
PPP2R5A
PPP2R5B
PPP2R5E
MEDAG
PPRC1
PQLC2
PRDM15
PRDM2
PREPL
PRIM1
PRKAA2
PRKCI
PRKCQ
PRKCQ-AS1
PRMT3
PRNP
PRPF19
PRPF3
PRPS1
PRRG1
PRRT4
DCLK1
PSMA1
PSMD10
PSMD11
PSMD12
PSME4
PSMG1
PSMG3
PSMG3-AS1
PSTK
PTDSS1
PTEN
PTGIS
PTK2
PTOV1-AS1
PTPLA
PTPLAD1
PTPN1
PTPN12
PTPN21
PTPRS
PTRH2
PTTG1IP
PURB
PUS1
PUS7
PVRIG2P
PXDC1
PXMP4
PXN
PYCR1
QSOX2
RAB11FIP5
RAB12
PRUNE2
RAB18
RAB1A
RAB21
RAB30
RAB35
RAB3GAP1
RAB5C
RABEP2
RABGEF1
RABGGTB
RACGAP1
RAD23B
RAI2
RAN
RANBP1
RANBP2
RANGAP1
RAP1A
RAP2C-AS1
RAPH1
RARA
RASA4B
RASA4CP
RASAL2
RASSF4
RASSF8
RBM10
RBM12
RBM38
RBM43
RBM8A
RBMS3
RC3H1
RCN1
RDH5
RECQL5
RERE
REXO2
MYOG
RFX7
RGMB
RGN
ITGA3
RGS6
RGS9BP
RHBDF1
RHEB
NAB2
NABP1
RHOG
RHOT1
RICTOR
RIMKLB
RIOK1
RMI1
ITGB2
RND3
RNF122
RNF146
RNF149
KIFC3
RNF185
RNF185-AS1
RNF34
RNF38
RNF6
RNFT1
RNPC3
ROCK2
RP11-1035H13.2
RP11-1055B8.7
RP11-1069G10.1
RP11-1084J3.4
LAPTM5
LCP1
RP11-1212A22.1
LGI4
RP11-138C9.1
RP11-141J13.5
RP11-141O15.1
RP11-152H18.3
LINC00202-1
RP11-159D12.5
RP11-182J1.1
RP11-182L21.6
RP11-192P3.5
RP11-20G6.3
RP11-212P7.3
RP11-215G15.5
RP11-23J9.4
RP11-256I23.2
RP11-258C19.7
RP11-271K21.11
RP11-293M10.6
LPIN2
RP11-299G20.2
RP11-29G8.3
RP11-315I20.1
MXRA5
RP11-329J18.2
RP11-334E6.3
RP11-361L15.4
RP11-371E8.4
RP11-384K6.6
RP11-386G11.10
RP11-386G11.3
RP11-386G11.5
RP11-388M20.9
LYVE1
RP11-427H3.3
RP11-434D12.1
RP11-450K4.1
RP11-45M22.3
MAP3K14
RP11-46C24.7
RP11-474G23.1
MAP3K7CL
RP11-47A8.5
RP11-490O6.2
RP11-498C9.3
RP11-500C11.3
RP11-505K9.4
RP11-514P8.8
RP11-517P14.2
RP11-546B15.1
PRELID1
RP11-554I8.2
RP11-574K11.5
RP11-57A19.2
RP11-582J16.3
RP11-5A19.5
RP11-613M10.9
RP11-617F23.1
RP11-618P17.4
RP11-661O13.1
RP11-67L3.5
RP1-170O19.20
RP11-71H17.7
RP11-727F15.9
RP11-736K20.5
RP11-73M18.10
RP11-73M18.7
RP11-73M18.8
RP11-74E22.5
RP11-761B3.1
RP11-773D16.1
RP11-773H22.4
RP11-77H9.2
RP11-787I22.3
RP11-822E23.8
RP11-849H4.4
RP11-867G23.8
RP11-876N24.4
RP11-96L14.7
RP11-96O20.4
RP11-977G19.14
RP1-283E3.4
RP1-317E23.3
RP13-270P17.1
RP13-270P17.3
RP13-39P12.3
PRSS45
RP1-4G17.2
RP3-467L1.4
RP3-508I15.14
RP3-508I15.18
RP3-508I15.19
RP4-607J23.2
RP4-614O4.11
RP4-769N13.6
RP4-798P15.3
RP4-800J21.3
RP5-1024G6.2
RP5-1139B12.4
RP5-821D11.7
RP5-850E9.3
RP5-956O18.3
RP5-977B1.7
RPA1
RPA3-AS1
RPE
RPF1
RPF2
RPGR
RPL22L1
RPL23AP82
RPL7L1
RPL7P3
RPN2
RPP25L
RPRD1B
RQCD1
RRAD
RRBP1
RRN3
RRP1
RRP9
RSBN1L-AS1
RSL1D1
RTN3
RUSC2
RXRA
PEA15
S100A16
SACM1L
SAMD14
SARS
SBDS
SBDSP1
SBK1
SBNO2
SCHIP1
SCN3B
SCN4A
SCYL2
SDAD1
SDAD1P1
SDCCAG3
SDK1
SEC14L1
SEC16B
SEC24D
SEC31A
SEC61A1
SEC61B
SEH1L
MYH8
SEMA3C
SEMA4B
SENP3-EIF4A1
SENP8
2015-09-09
SERPINA5
SERPINH1
SERTAD1
SESN1
PPIA
SET
SF1
SFMBT1
SFPQ
NES
NFKB2
SGCB
SGCD
SGMS2
SGPP1
SH2B3
SH3BP1
SH3BP2
SH3BP5-AS1
SH3BP5L
SH3GL1
SH3KBP1
SH3RF1
NNMT
SHMT1
SHQ1
SIDT2
SIGMAR1
SIK3
SIPA1L3
SIRT4
SIX1
NPNT
SLAIN2
PTPRE
SLC15A4
NUMBL
SLC16A7
SLC17A5
SLC18A2
SLC1A3
SLC20A2
PARP10
SLC25A20
SLC25A25
RP11-401P9.5
SLC25A44
SLC26A6
SLC27A1
SLC29A1
SLC29A2
SLC2A11
SLC2A12
SLC2A4
SLC31A1
SLC35C1
SLC35E4
SLC35F5
SLC35F6
RCC2
SLC36A4
SLC37A4
SLC39A14
SLC39A6
SLC39A7
SLC3A1
SLC3A2
SLC40A1
SLC45A3
SLC45A4
SLC46A3
PERP
SLC52A2
SLC5A3
SLC7A2
SLC7A8
SLC8A3
SLC8B1
SLCO5A1
SLK
SLMAP
SLMO2
SMAD1
SMAD1-AS1
SMARCA4
SMARCD2
SMG1
SMG1P1
SMIM12
SMO
SMOC1
SMS
SMURF1
SMYD4
SMYD5
SNAI3
SNAI3-AS1
SNAPC1
SNAPC5
SNED1
SNPH
SNRPA1
SNRPD1
SNTB1
SNTB2
SNX17
SNX25
SOAT1
SOCS4
SOCS6
PPP1R18
SOGA3
SORBS1
SORBS3
SORT1
SOX4
SPAG9
SPAST
SPATS2
SPCS3
SPEN
SPPL2B
SPRY1
SRP14-AS1
SRPK2
SRRT
SRSF1
SRSF10
SRSF2
SRSF3
SRSF6
SRSF7
SRSF8
SRXN1
SSBP2
SSBP3
SSH1
SSX2IP
ST5
ST6GAL1
ST8SIA4
STAG3L5P
STAG3L5P-PVRIG2P-PILRB
STAM
STARD8
S100A6
STAT3
STK16
STK17B
STK33
STK35
STK39
STOM
STRBP
STRIP2
STRN3
STRN4
STX3
SUFU
SUN2
SUOX
SUV39H2
SYNE2
SYNJ2
SYNPO2
SYT7
SYTL3
TAF1B
TAF4B
TAF5L
TAF9
RIN1
SMAP2
TARS2
TAX1BP3
TBC1D15
TBC1D22B
TBC1D23
TBC1D3P1-DHX40P1
TBCA
TBL2
TCEAL8
TCOF1
TCP1
TEAD1
TEAD3
TEAD4
TECRL
TEF
TENM4
TET3
TFDP2
TFE3
TFPI
SLC1A7
RP11-830F9.5
TGFBR1
TGFBR3
TGIF1
THAP2
THAP8
THBD
SMAD9
THUMPD2
TIAF1
TIAM2
TICAM1
TIMM22
TIMM8A
TJP2
TKT
TLE3
TLN2
TM2D2
TM6SF1
TMEFF1
TMEM104
S100A11
TMEM11
TMEM140
TMEM150A
TMEM165
TMEM183A
TMEM184A
TMEM189
TMEM189-UBE2V1
TMEM194A
TMEM214
TMEM233
TMEM237
TMEM251
TMEM30A
TMEM38A
TMEM38B
TMEM57
2015-09-05
SESN2
TMX2
TNFSF10
TNKS1BP1
SLIT2
TNPO1
TNRC6B
TNS3
TOM1
TOMM22
TOMM34
TOMM70A
TOR3A
TP53
TP53BP2
TPCN1
TPD52L1
TPPP
TPPP2
TRA2B
TRABD
TRAF2
TRAF5
TAGLN
TRAPPC11
TRIM25
TRIM27
TRIM45
TRIM47
TRIM52
TRIM54
TRIM55
TRIM66
TRIM72
TRIM8
TRIO
TRIP4
TRMT1
TRO
TSC22D1
TSC22D2
TSEN54
TSHZ1
TSPAN15
TSPAN9
TTC28
TTC30A
TTC4
TTC5
TTC9
TTI2
TTLL11
TTLL12
TTLL4
TNFRSF21
TUBA1B
TUBB
TUBB2A
TUBE1
TUBGCP5
TWF1
TWISTNB
TWSG1
TXNDC11
TXNDC16
TXNDC5
TPM4
TYW5
U2SURP
U91328.19
UBA2
TGFB3
UBAC2
UBALD2
UBAP1L
UBASH3B
UBE2D3
TRAFD1
UBE2N
UBE2W
UBE2Z
UBE3A
UBIAD1
UBP1
UBQLN1
UBR7
UBTD2
UBXN2A
UBXN4
UCHL3
UCP3
UGCG
UGGT1
UIMC1
ULK1
TNFRSF10B
UPP1
URAHP
URB1
URGCP
USP12
USP31
USP47
USPL1
UTP14A
UTP15
UTP18
UTP3
UTP6
UTS2
UVRAG
UXS1
VAPA
VARS
VASP
VCL
VCP
VEZF1
TPPP3
VIMP
VIPR2
VMP1
VOPP1
VPS37A
VPS54
VRK1
WBP1L
WBP2
WBP4
WDFY1
WDR12
WDR26
WDR3
WDR43
WDR45B
WDR46
WDR55
WDR75
WDR82
WDR90
WDR91
WEE1
WHAMM
WIPI1
WNK1
WNK2
WRAP53
XIAP
XPO5
XPO6
XPOT
XXbac-B461K10.4
WNT9A
XXbac-BPG252P9.9
XXbac-BPG32J3.20
XXbac-BPGBPG55C20.2
YAF2
YARS
YBX2
YEATS2
YES1
YPEL2
YPEL3
YRDC
YWHAG
YWHAH
YWHAQ
YWHAZ
ZADH2
ZBED4
ZBED5-AS1
ZBTB2
ZBTB21
ZBTB38
ZBTB42
ZBTB43
ZBTB48
ZBTB49
ZBTB7A
ZC3H8
ZCCHC10
ZCCHC2
ZDHHC17
ZDHHC18
ZDHHC2
ZDHHC9
ZEB1-AS1
ZEB2
ZFAND2A
ZFHX4
ZFP36L1
ZFYVE26
ZMAT1
ZMIZ1
ZMIZ2
ZMPSTE24
ZMYM3
ZMYND19
ZMYND8
ZNF112
WISP2
ZNF136
ZNF143
ZNF146
ZNF204P
ZNF239
ZNF253
ZNF259
ZNF326
ZNF33A
ZNF410
ZNF423
ZNF429
ZNF436
ZNF470
ZNF473
ZNF485
ZNF513
ZNF385B
ZNF577
ZNF579
ZNF584
ZNF593
[truncated: 25 more rows]
